# Supplementary material for: Design in solid state chemistry based on phase homologies. Sb4Te3 and Sb8Te9 as new members of the series (Sb2Te3)m·(Sb2)n
Source: Royal Society of Chemistry journal article supplement (doi:10.1039/b500695c), 2005-01-01
Supplement: b500695c.pdf [file b500695c.pdf]

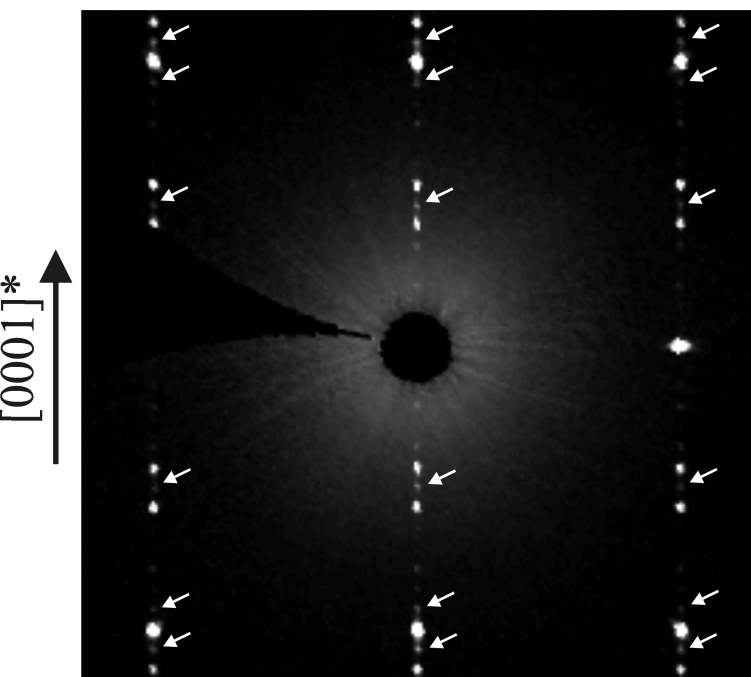

Simulated precession photograph of  $\text{Sb}_4\text{Te}_3$ .  
Weak superstructure reflections along  $[0001]^*$  are indicated.

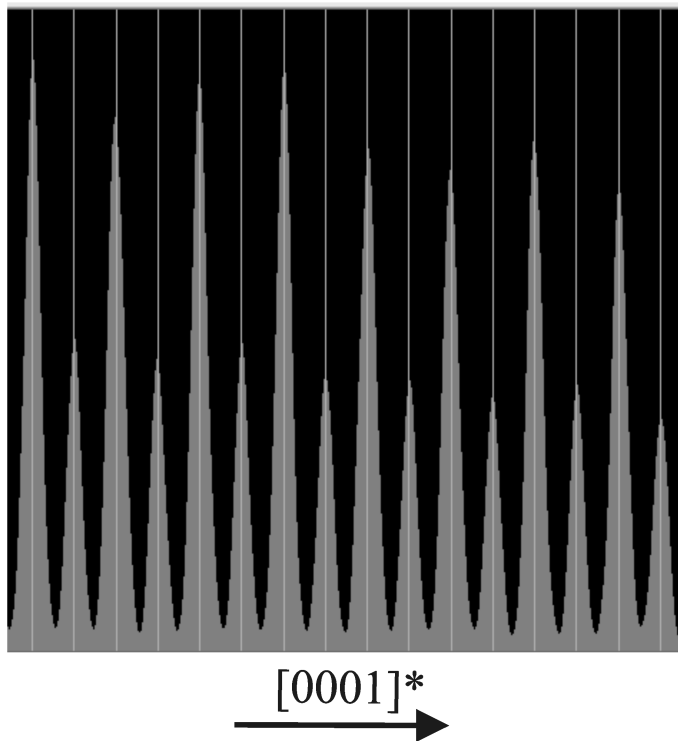

Indexing pattern of  $\text{Sb}_4\text{Te}_3$  along  $[0001]^*$ .
